# Supplementary material
Source: PubMed Central journal article supplement (PMC6895402)
Supplement: NIHMS1047331-supplement-Supplemental_Table_1.pdf [file NIHMS1047331-supplement-Supplemental_Table_1.pdf]

**Supplementary Table 1. Significantly upregulated genes in miR-29b knockdown cells upon rapamycin treatment in Tsc2<sup>-/-</sup> MEFs, as quantified by RNA-sequencing**

| Gene     | Fold change | pval      | padj      | In CI | TS Target |
|----------|-------------|-----------|-----------|-------|-----------|
| AW551984 | 6.67178593  | 1.90E-63  | 3.02E-60  | -     | -         |
| Rspo2    | 5.45888385  | 8.90E-79  | 3.54E-75  | yes   | -         |
| Sfrp1    | 4.74831288  | 2.08E-187 | 3.30E-183 | yes   | -         |
| C1ql3    | 4.74572992  | 5.21E-30  | 1.31E-27  | yes   | -         |
| Rnf144a  | 4.62667256  | 1.15E-37  | 4.81E-35  | yes   | -         |
| Mgp      | 4.61037148  | 1.23E-21  | 1.87E-19  | yes   | -         |
| Ptn      | 4.49730585  | 4.01E-44  | 2.36E-41  | yes   | -         |
| Aspn     | 4.45289934  | 1.93E-20  | 2.58E-18  | -     | -         |
| Gm4070   | 4.38626811  | 3.84E-37  | 1.53E-34  | -     | -         |
| Slc5a7   | 4.2904144   | 1.91E-65  | 3.38E-62  | yes   | -         |
| Lrrc17   | 4.2043798   | 2.08E-17  | 2.12E-15  | -     | -         |
| Bmp3     | 4.11608849  | 4.31E-16  | 3.71E-14  | yes   | -         |
| Nov      | 4.04058449  | 2.18E-61  | 3.15E-58  | yes   | -         |
| Phactr2  | 3.98097552  | 1.02E-33  | 3.31E-31  | yes   | yes       |
| Scara3   | 3.97891754  | 2.83E-76  | 7.49E-73  | yes   | -         |
| Trp63    | 3.97183585  | 4.64E-14  | 3.17E-12  | -     | -         |
| Wnt16    | 3.92352393  | 1.13E-13  | 7.42E-12  | yes   | -         |
| Ch25h    | 3.73723685  | 2.56E-47  | 1.70E-44  | -     | -         |
| Gabrb3   | 3.62023161  | 2.05E-10  | 9.23E-09  | yes   | -         |
| Cxcl5    | 3.60006761  | 1.83E-15  | 1.44E-13  | yes   | -         |
| Figf     | 3.56355947  | 2.05E-33  | 6.51E-31  | yes   | -         |
| Col28a1  | 3.54700902  | 2.10E-14  | 1.50E-12  | -     | -         |
| Serpine2 | 3.54446774  | 5.56E-15  | 4.23E-13  | yes   | -         |
| Cdh10    | 3.53010721  | 4.19E-30  | 1.07E-27  | yes   | -         |
| Pgm5     | 3.50903904  | 1.06E-14  | 7.84E-13  | yes   | -         |
| Ogn      | 3.46002149  | 5.78E-22  | 9.10E-20  | yes   | -         |
| Aoc3     | 3.4570321   | 2.85E-34  | 9.44E-32  | yes   | -         |

|         |            |           |           |     |   |
|---------|------------|-----------|-----------|-----|---|
| Ly6a    | 3.43087366 | 1.19E-48  | 9.03E-46  | -   | - |
| Elfn1   | 3.41117791 | 1.50E-51  | 1.59E-48  | -   | - |
| Fap     | 3.34567429 | 5.72E-10  | 2.45E-08  | yes | - |
| Kcnj2   | 3.32686656 | 3.57E-24  | 6.67E-22  | yes | - |
| Plagl1  | 3.28318262 | 8.72E-11  | 4.24E-09  | yes | - |
| Dysf    | 3.24285159 | 8.03E-30  | 1.99E-27  | yes | - |
| S1pr3   | 3.2428381  | 2.13E-106 | 1.70E-102 | -   | - |
| Ppbp    | 3.23829631 | 9.04E-20  | 1.14E-17  | yes | - |
| Tmem252 | 3.22828512 | 1.90E-08  | 6.50E-07  | -   | - |
| Igfbp5  | 3.21951863 | 4.03E-33  | 1.26E-30  | yes | - |
| Fibin   | 3.19577536 | 3.78E-10  | 1.65E-08  | -   | - |
| Gfra2   | 3.15740647 | 1.33E-20  | 1.82E-18  | yes | - |
| Them7   | 3.15389144 | 7.10E-08  | 2.16E-06  | -   | - |
| Sned1   | 3.13928498 | 7.81E-15  | 5.91E-13  | -   | - |
| Plin4   | 3.10279418 | 2.38E-50  | 2.10E-47  | -   | - |
| Gem     | 3.10258127 | 6.95E-23  | 1.19E-20  | yes | - |
| Dchs1   | 3.02237987 | 1.26E-16  | 1.15E-14  | yes | - |
| Vcan    | 3.01401375 | 3.42E-22  | 5.49E-20  | yes | - |
| Capn6   | 2.9915206  | 6.65E-44  | 3.65E-41  | yes | - |
| Bace2   | 2.97912158 | 5.72E-12  | 3.16E-10  | yes | - |
| Rab3il1 | 2.96048799 | 4.66E-17  | 4.63E-15  | yes | - |
| Nsg1    | 2.95604248 | 1.32E-43  | 6.98E-41  | -   | - |
| Tgfbi   | 2.95432184 | 1.30E-21  | 1.95E-19  | yes | - |
| Lgr5    | 2.94278063 | 1.16E-15  | 9.43E-14  | -   | - |
| Dgkk    | 2.93611403 | 5.59E-12  | 3.09E-10  | -   | - |
| Cxcl1   | 2.92496832 | 7.41E-17  | 7.09E-15  | yes | - |
| P2ry1   | 2.91889234 | 2.46E-07  | 6.68E-06  | yes | - |
| Six1    | 2.90967093 | 1.08E-20  | 1.49E-18  | yes | - |
| Enpp2   | 2.90724972 | 1.23E-13  | 8.05E-12  | yes | - |
| Penk    | 2.88623946 | 4.71E-07  | 1.23E-05  | -   | - |
| Ntf3    | 2.88326812 | 4.21E-08  | 1.34E-06  | yes | - |
| Rspo3   | 2.88039367 | 1.32E-27  | 3.04E-25  | -   | - |

|          |            |          |          |     |     |
|----------|------------|----------|----------|-----|-----|
| Ebf3     | 2.85638213 | 1.41E-35 | 4.87E-33 | yes | -   |
| Plxnc1   | 2.85123905 | 6.64E-07 | 1.68E-05 | yes | -   |
| Sorcs1   | 2.84425931 | 1.56E-10 | 7.18E-09 | yes | -   |
| Elmo1    | 2.82040628 | 3.00E-50 | 2.51E-47 | yes | -   |
| Itga11   | 2.79784298 | 9.17E-25 | 1.78E-22 | yes | yes |
| Negr1    | 2.78669286 | 9.05E-11 | 4.39E-09 | -   | yes |
| Tspan11  | 2.75886335 | 2.15E-06 | 4.83E-05 | -   | -   |
| Apob     | 2.74645947 | 1.95E-06 | 4.43E-05 | yes | -   |
| Nrcam    | 2.72347949 | 2.17E-22 | 3.52E-20 | yes | -   |
| Ly6c1    | 2.69499389 | 6.36E-27 | 1.40E-24 | -   | -   |
| Murc     | 2.686653   | 5.14E-20 | 6.70E-18 | -   | -   |
| Hic1     | 2.66914374 | 5.32E-15 | 4.09E-13 | yes | -   |
| Dgki     | 2.6575853  | 7.85E-09 | 2.84E-07 | yes | -   |
| Lppr4    | 2.64442673 | 8.95E-08 | 2.66E-06 | yes | yes |
| Pcdh17   | 2.63376203 | 5.35E-21 | 7.66E-19 | yes | -   |
| Syne4    | 2.62580904 | 2.41E-08 | 8.02E-07 | -   | -   |
| Zfx4     | 2.62194605 | 6.85E-14 | 4.62E-12 | -   | -   |
| Gas2     | 2.61600627 | 7.49E-12 | 4.07E-10 | -   | -   |
| Kc-4     | 2.61230256 | 1.57E-10 | 7.22E-09 | yes | -   |
| Kcnmb4   | 2.61197665 | 7.92E-29 | 1.88E-26 | -   | -   |
| Serpib1a | 2.59990156 | 8.25E-15 | 6.19E-13 | -   | -   |
| Abcd2    | 2.58904313 | 4.72E-13 | 2.86E-11 | yes | -   |
| Serpi-3f | 2.57678827 | 5.44E-18 | 6.13E-16 | -   | -   |
| Fxyd7    | 2.57508133 | 6.42E-09 | 2.36E-07 | yes | -   |
| Agap2    | 2.57157994 | 6.74E-37 | 2.55E-34 | -   | -   |
| Fbln7    | 2.56636078 | 5.09E-06 | 1.05E-04 | -   | -   |
| Emilin1  | 2.55478697 | 3.05E-13 | 1.91E-11 | yes | -   |
| Mylip    | 2.55366628 | 7.95E-24 | 1.42E-21 | yes | -   |
| Myl9     | 2.55026294 | 2.72E-32 | 8.01E-30 | yes | -   |
| Igf1     | 2.54613691 | 3.48E-11 | 1.74E-09 | yes | yes |
| Sim2     | 2.53465431 | 3.43E-36 | 1.21E-33 | yes | -   |
| En1      | 2.52735618 | 4.28E-21 | 6.25E-19 | yes | yes |

|          |            |          |          |     |     |
|----------|------------|----------|----------|-----|-----|
| Mpped2   | 2.51151345 | 2.28E-16 | 2.00E-14 | yes | -   |
| Adora2b  | 2.50652565 | 1.26E-41 | 6.09E-39 | yes | -   |
| Tbx5     | 2.50342633 | 1.21E-26 | 2.56E-24 | yes | -   |
| Slc38a4  | 2.4971682  | 9.86E-71 | 1.96E-67 | yes | -   |
| Epha3    | 2.49565412 | 6.40E-11 | 3.14E-09 | yes | -   |
| Gm2115   | 2.47869713 | 1.18E-25 | 2.40E-23 | -   | -   |
| Cck      | 2.47489617 | 1.57E-09 | 6.27E-08 | yes | -   |
| Hoxc5    | 2.46631658 | 1.07E-46 | 6.81E-44 | -   | -   |
| Mfap5    | 2.46548419 | 2.66E-10 | 1.18E-08 | yes | -   |
| Matn2    | 2.45393154 | 1.82E-50 | 1.70E-47 | yes | -   |
| Htr2a    | 2.44432988 | 1.27E-17 | 1.34E-15 | yes | -   |
| Tshz3    | 2.44321699 | 3.31E-13 | 2.07E-11 | yes | -   |
| Postn    | 2.42877526 | 5.82E-08 | 1.79E-06 | -   | -   |
| Ednra    | 2.42133048 | 1.91E-08 | 6.50E-07 | yes | -   |
| Lck      | 2.40888747 | 5.06E-06 | 1.05E-04 | yes | -   |
| Gabra3   | 2.40631415 | 5.51E-08 | 1.71E-06 | yes | -   |
| Zdhhc15  | 2.40155026 | 1.03E-09 | 4.20E-08 | -   | yes |
| Mcf2l    | 2.39018949 | 1.82E-09 | 7.19E-08 | yes | -   |
| Hoxa6    | 2.38577998 | 9.13E-10 | 3.77E-08 | -   | -   |
| Medag    | 2.37695897 | 1.01E-50 | 1.00E-47 | -   | -   |
| Adamtsl3 | 2.37115176 | 7.06E-10 | 2.96E-08 | yes | -   |
| Pde1b    | 2.35190535 | 5.07E-06 | 1.05E-04 | yes | -   |
| Il1r1    | 2.3424301  | 4.99E-21 | 7.21E-19 | yes | -   |
| Slc16a9  | 2.33382599 | 1.72E-07 | 4.81E-06 | yes | -   |
| Mfap2    | 2.33328898 | 4.80E-09 | 1.80E-07 | yes | yes |
| Mark1    | 2.31533669 | 1.71E-11 | 8.92E-10 | yes | -   |
| Id4      | 2.31368105 | 1.61E-16 | 1.44E-14 | yes | -   |
| Arhgap36 | 2.31048544 | 9.97E-05 | 1.48E-03 | -   | yes |
| Mapkapk3 | 2.30462976 | 9.83E-32 | 2.79E-29 | yes | -   |
| Crabp2   | 2.30204654 | 2.85E-10 | 1.27E-08 | yes | -   |
| Tgtp2    | 2.30162532 | 5.22E-05 | 8.29E-04 | -   | -   |
| Mmp9     | 2.30092666 | 1.45E-06 | 3.42E-05 | yes | -   |

|          |            |          |          |     |     |
|----------|------------|----------|----------|-----|-----|
| Ednrb    | 2.29911081 | 9.39E-05 | 1.40E-03 | yes | -   |
| Hgf      | 2.29633321 | 7.38E-05 | 1.13E-03 | yes | -   |
| Rgag4    | 2.29545953 | 1.05E-10 | 5.02E-09 | -   | yes |
| Prkg1    | 2.29296765 | 5.01E-07 | 1.29E-05 | yes | yes |
| Ssc5d    | 2.28877239 | 1.69E-27 | 3.79E-25 | -   | -   |
| Irx3     | 2.28755432 | 1.32E-12 | 7.78E-11 | -   | -   |
| Prrx1    | 2.28519456 | 1.78E-30 | 4.79E-28 | yes | -   |
| Mecom    | 2.27929238 | 1.50E-11 | 7.82E-10 | -   | -   |
| Bnip3    | 2.26906195 | 8.99E-16 | 7.36E-14 | yes | -   |
| Diras2   | 2.26410678 | 5.01E-05 | 8.01E-04 | yes | -   |
| Sfmbt2   | 2.2539617  | 3.55E-12 | 2.02E-10 | -   | -   |
| Sema5a   | 2.25190505 | 1.55E-15 | 1.24E-13 | -   | -   |
| Hoxb5    | 2.25138533 | 1.12E-16 | 1.03E-14 | yes | -   |
| B4galnt1 | 2.24875112 | 5.19E-17 | 5.09E-15 | yes | -   |
| Lrch2    | 2.24813084 | 5.47E-10 | 2.35E-08 | -   | -   |
| Tlr1     | 2.23914973 | 1.40E-04 | 1.99E-03 | yes | -   |
| Ctca3a2  | 2.23756718 | 1.62E-04 | 2.27E-03 | -   | -   |
| Hoxb9    | 2.23332312 | 2.39E-24 | 4.53E-22 | yes | -   |
| Bhlhe41  | 2.23097446 | 7.29E-08 | 2.21E-06 | -   | -   |
| Thbs2    | 2.22846917 | 3.50E-38 | 1.54E-35 | yes | -   |
| Calml4   | 2.22751477 | 2.10E-08 | 7.13E-07 | -   | -   |
| Svip     | 2.22044063 | 8.70E-06 | 1.70E-04 | -   | -   |
| Rnls     | 2.21330151 | 4.75E-05 | 7.68E-04 | -   | -   |
| Arhgap20 | 2.21072412 | 3.63E-05 | 6.02E-04 | -   | yes |
| Il6      | 2.20984779 | 1.51E-06 | 3.53E-05 | yes | -   |
| Cyp2j6   | 2.198487   | 6.09E-07 | 1.55E-05 | -   | -   |
| Gm5662   | 2.19838338 | 1.90E-04 | 2.60E-03 | -   | -   |
| Arrdc3   | 2.19748909 | 1.11E-10 | 5.30E-09 | yes | yes |
| Hoxb8    | 2.19572595 | 1.04E-12 | 6.18E-11 | yes | -   |
| Serpinf1 | 2.1913577  | 5.51E-15 | 4.21E-13 | yes | -   |
| Rnf130   | 2.17567943 | 1.32E-07 | 3.80E-06 | yes | -   |
| Tbx3     | 2.16872932 | 6.67E-16 | 5.58E-14 | yes | -   |

|          |            |          |          |     |     |
|----------|------------|----------|----------|-----|-----|
| Hoxc4    | 2.16613326 | 3.85E-24 | 7.12E-22 | yes | -   |
| Nr2f1    | 2.16064642 | 3.53E-14 | 2.42E-12 | yes | -   |
| S1pr1    | 2.15972706 | 1.45E-35 | 4.90E-33 | -   | -   |
| Mmp19    | 2.15669625 | 2.20E-19 | 2.74E-17 | yes | -   |
| Tac1     | 2.14174096 | 3.90E-04 | 4.83E-03 | yes | -   |
| Cpxm1    | 2.14070797 | 4.27E-20 | 5.65E-18 | yes | -   |
| Grb10    | 2.13698088 | 2.10E-43 | 1.08E-40 | yes | -   |
| Dclk1    | 2.1316787  | 4.35E-16 | 3.72E-14 | yes | yes |
| H2-Q1    | 2.12814286 | 3.64E-04 | 4.56E-03 | -   | -   |
| Pdgfra   | 2.12720784 | 5.49E-59 | 7.28E-56 | yes | -   |
| Pros1    | 2.12545984 | 3.11E-19 | 3.78E-17 | yes | -   |
| Tcf4     | 2.11757197 | 1.99E-52 | 2.27E-49 | yes | -   |
| Rragd    | 2.11645821 | 1.96E-05 | 3.50E-04 | yes | -   |
| Adh1     | 2.11626457 | 2.38E-04 | 3.16E-03 | -   | -   |
| Lrrc32   | 2.11618976 | 1.47E-17 | 1.54E-15 | -   | -   |
| Rasgrp3  | 2.11392618 | 2.81E-17 | 2.83E-15 | yes | -   |
| Pcdhb21  | 2.11232672 | 3.21E-08 | 1.04E-06 | -   | -   |
| Zfp365   | 2.10450801 | 2.78E-25 | 5.53E-23 | -   | -   |
| Dlk1     | 2.10348423 | 5.71E-08 | 1.76E-06 | yes | -   |
| Abi3bp   | 2.10000535 | 2.85E-08 | 9.37E-07 | yes | -   |
| Serpi-3n | 2.09989763 | 1.94E-06 | 4.42E-05 | -   | -   |
| Nfatc4   | 2.09812117 | 3.44E-19 | 4.11E-17 | yes | yes |
| Rarb     | 2.09483992 | 1.06E-09 | 4.32E-08 | yes | yes |
| Notch3   | 2.09432015 | 5.17E-19 | 6.00E-17 | yes | -   |
| Bzrap1   | 2.08815963 | 5.12E-06 | 1.06E-04 | yes | -   |
| Pid1     | 2.08701504 | 7.71E-06 | 1.53E-04 | yes | -   |
| Fam161a  | 2.08614292 | 7.12E-06 | 1.43E-04 | -   | -   |
| Mafb     | 2.08546196 | 5.63E-05 | 8.91E-04 | yes | yes |
| Artn     | 2.08395915 | 1.47E-04 | 2.08E-03 | yes | -   |
| Apln     | 2.07421149 | 5.57E-07 | 1.43E-05 | yes | -   |
| Enpp3    | 2.0693476  | 3.72E-04 | 4.64E-03 | yes | -   |
| Ms4a4d   | 2.0686248  | 1.29E-06 | 3.08E-05 | -   | -   |

|          |            |          |          |     |     |
|----------|------------|----------|----------|-----|-----|
| Htra3    | 2.06772167 | 7.67E-07 | 1.92E-05 | -   | -   |
| Pla2g7   | 2.06727168 | 7.03E-14 | 4.72E-12 | yes | -   |
| Qpct     | 2.06504182 | 8.49E-06 | 1.67E-04 | -   | -   |
| Phospho1 | 2.06413596 | 1.31E-11 | 6.85E-10 | yes | -   |
| Fendrr   | 2.06123501 | 2.77E-04 | 3.60E-03 | -   | -   |
| Dkk3     | 2.06007948 | 1.84E-07 | 5.13E-06 | yes | -   |
| Hoxc6    | 2.05877761 | 5.94E-22 | 9.26E-20 | -   | -   |
| Cish     | 2.05836667 | 7.48E-05 | 1.14E-03 | yes | -   |
| Slc40a1  | 2.05133341 | 1.37E-05 | 2.56E-04 | yes | -   |
| Gpr88    | 2.04700837 | 1.06E-05 | 2.04E-04 | -   | -   |
| Lynx1    | 2.04553043 | 6.36E-12 | 3.49E-10 | -   | -   |
| Dok5     | 2.04458919 | 6.29E-07 | 1.59E-05 | yes | -   |
| Irak3    | 2.04332119 | 6.69E-09 | 2.45E-07 | yes | -   |
| Hoxa5    | 2.04022321 | 1.59E-10 | 7.28E-09 | yes | -   |
| Pdp1     | 2.03382564 | 1.37E-13 | 8.87E-12 | -   | -   |
| Hoxc8    | 2.03353384 | 1.99E-16 | 1.76E-14 | yes | -   |
| Meg3     | 2.02079223 | 2.29E-32 | 6.88E-30 | -   | -   |
| Car13    | 2.02057374 | 1.04E-20 | 1.46E-18 | -   | -   |
| Rps6ka6  | 2.0194774  | 2.14E-07 | 5.92E-06 | yes | -   |
| Il1rn    | 2.01712851 | 2.64E-18 | 3.00E-16 | yes | -   |
| Tril     | 2.01618497 | 1.82E-08 | 6.22E-07 | -   | yes |
| Setbp1   | 2.01526003 | 3.04E-15 | 2.38E-13 | yes | -   |
| Tmem74   | 2.01446955 | 1.88E-04 | 2.58E-03 | yes | -   |
| Ttyh2    | 2.01411492 | 4.79E-75 | 1.09E-71 | yes | yes |
| Satb2    | 2.01236639 | 1.81E-06 | 4.16E-05 | yes | -   |
| C1qtnf6  | 2.00667503 | 9.25E-09 | 3.31E-07 | yes | yes |
| Nhs      | 2.00473563 | 4.96E-07 | 1.29E-05 | -   | -   |
| Hoxa7    | 2.00285781 | 2.25E-08 | 7.56E-07 | yes | -   |
| Anpep    | 1.99247414 | 3.27E-06 | 7.12E-05 | yes | -   |
| Ddr2     | 1.99001734 | 4.33E-09 | 1.64E-07 | yes | -   |
| Gsap     | 1.98773165 | 4.02E-09 | 1.53E-07 | -   | -   |
| Emilin2  | 1.98525868 | 1.17E-56 | 1.43E-53 | yes | -   |

|         |            |          |          |     |     |
|---------|------------|----------|----------|-----|-----|
| Sema6b  | 1.98164289 | 2.10E-06 | 4.74E-05 | -   | -   |
| Cacng7  | 1.97847523 | 5.04E-20 | 6.62E-18 | -   | -   |
| Rab39b  | 1.96961274 | 3.10E-07 | 8.27E-06 | yes | -   |
| Bach2   | 1.96888521 | 1.80E-07 | 5.01E-06 | yes | yes |
| Gm15446 | 1.96856452 | 4.97E-05 | 7.97E-04 | -   | -   |
| Prdm11  | 1.9681825  | 5.57E-18 | 6.23E-16 | -   | -   |
| Cda     | 1.96644795 | 6.38E-04 | 7.32E-03 | yes | -   |
| Cdhr1   | 1.96628576 | 3.54E-11 | 1.77E-09 | -   | -   |
| Col6a3  | 1.96539869 | 5.34E-06 | 1.10E-04 | yes | yes |
| Dock3   | 1.96311542 | 1.71E-03 | 1.66E-02 | yes | -   |
| Stc2    | 1.96268684 | 7.01E-05 | 1.08E-03 | yes | -   |
| Nrg1    | 1.96176197 | 4.36E-12 | 2.45E-10 | yes | -   |
| Slc1a3  | 1.96051    | 1.23E-31 | 3.43E-29 | yes | -   |
| Lrrk2   | 1.95815912 | 1.37E-08 | 4.80E-07 | yes | -   |
| Syt13   | 1.9570261  | 5.61E-10 | 2.40E-08 | yes | -   |
| Clmp    | 1.95616084 | 9.45E-11 | 4.57E-09 | -   | -   |
| Grem1   | 1.9558219  | 1.29E-11 | 6.82E-10 | yes | -   |
| Tnfsf15 | 1.95101923 | 4.26E-07 | 1.12E-05 | yes | -   |
| Col24a1 | 1.94967682 | 1.67E-03 | 1.63E-02 | yes | yes |
| Spib    | 1.94894584 | 2.25E-05 | 3.95E-04 | yes | -   |
| Plcl2   | 1.94874862 | 1.41E-03 | 1.42E-02 | yes | -   |
| Plag1   | 1.94842041 | 1.38E-03 | 1.40E-02 | yes | yes |
| Osr1    | 1.9475657  | 8.38E-24 | 1.46E-21 | yes | -   |
| Igtp    | 1.94651168 | 7.57E-05 | 1.16E-03 | -   | -   |
| Lrfn3   | 1.94590732 | 3.61E-04 | 4.53E-03 | -   | -   |
| Ptpm    | 1.9444296  | 1.62E-22 | 2.72E-20 | yes | -   |
| Hoxa4   | 1.94394042 | 1.17E-07 | 3.40E-06 | -   | -   |
| Rtl1    | 1.94134699 | 8.66E-05 | 1.30E-03 | -   | -   |
| Fzd1    | 1.93988348 | 1.33E-19 | 1.67E-17 | yes | -   |
| Sdc3    | 1.93945594 | 3.63E-29 | 8.74E-27 | yes | -   |
| Ebf1    | 1.93683358 | 1.23E-06 | 2.96E-05 | yes | -   |
| Wnk3    | 1.93639597 | 1.28E-04 | 1.84E-03 | yes | -   |

|           |            |          |          |     |     |
|-----------|------------|----------|----------|-----|-----|
| Angpt1    | 1.93378312 | 1.63E-04 | 2.28E-03 | yes | -   |
| Zfp804a   | 1.93320549 | 2.08E-03 | 1.95E-02 | -   | -   |
| Frzb      | 1.93293349 | 1.93E-04 | 2.63E-03 | yes | -   |
| Lhfp12    | 1.92933544 | 1.68E-17 | 1.75E-15 | -   | -   |
| Aldh1a7   | 1.92815763 | 1.21E-05 | 2.30E-04 | -   | -   |
| Mirg      | 1.92635687 | 5.87E-09 | 2.17E-07 | -   | -   |
| Xk        | 1.92308696 | 1.10E-10 | 5.25E-09 | yes | -   |
| Tgfbr3    | 1.91985719 | 3.46E-50 | 2.75E-47 | yes | -   |
| Clec2d    | 1.91901369 | 4.75E-05 | 7.68E-04 | yes | -   |
| Ltbp1     | 1.91876762 | 5.02E-24 | 9.16E-22 | yes | -   |
| Mrv1      | 1.91573897 | 9.66E-05 | 1.43E-03 | yes | -   |
| Arhgef15  | 1.91310227 | 2.72E-04 | 3.54E-03 | yes | -   |
| Fbn2      | 1.90901707 | 2.86E-11 | 1.44E-09 | yes | -   |
| Cpm       | 1.90828811 | 6.70E-04 | 7.64E-03 | yes | -   |
| Fam212a   | 1.90720378 | 2.54E-07 | 6.90E-06 | -   | -   |
| Wnt10b    | 1.90576469 | 1.15E-15 | 9.39E-14 | -   | -   |
| Pkdcc     | 1.90398221 | 6.82E-17 | 6.65E-15 | -   | -   |
| B3galnt1  | 1.90199968 | 5.10E-16 | 4.31E-14 | -   | -   |
| Gpx3      | 1.90119828 | 7.55E-06 | 1.51E-04 | yes | -   |
| Slit2     | 1.90064224 | 9.89E-12 | 5.31E-10 | yes | -   |
| Ccdc141   | 1.90033399 | 2.71E-05 | 4.65E-04 | yes | -   |
| Pde9a     | 1.89906331 | 2.68E-03 | 2.41E-02 | yes | -   |
| Zfp503    | 1.8968479  | 7.71E-09 | 2.79E-07 | -   | -   |
| Fhod3     | 1.89583184 | 4.61E-08 | 1.46E-06 | -   | -   |
| Xdh       | 1.89275017 | 4.12E-42 | 2.05E-39 | yes | -   |
| Adam19    | 1.89138099 | 7.53E-17 | 7.17E-15 | yes | yes |
| Adam12    | 1.89000231 | 6.99E-06 | 1.40E-04 | yes | yes |
| Adhfe1    | 1.88895195 | 1.78E-03 | 1.72E-02 | yes | -   |
| Kcnmb4os2 | 1.88776084 | 6.83E-04 | 7.76E-03 | -   | -   |
| Svep1     | 1.88767055 | 2.31E-10 | 1.04E-08 | yes | yes |
| Lurap1l   | 1.88725583 | 1.66E-48 | 1.20E-45 | -   | -   |
| Dhrs3     | 1.88559652 | 1.63E-20 | 2.21E-18 | -   | -   |

|          |            |          |          |     |     |
|----------|------------|----------|----------|-----|-----|
| Pparg    | 1.88526588 | 1.11E-13 | 7.30E-12 | yes | -   |
| Col1a2   | 1.8820905  | 6.33E-44 | 3.60E-41 | yes | yes |
| Cpa6     | 1.87919008 | 1.94E-07 | 5.39E-06 | -   | -   |
| Angptl4  | 1.87866782 | 6.13E-09 | 2.26E-07 | -   | -   |
| Cdh26    | 1.87669864 | 2.51E-03 | 2.28E-02 | -   | -   |
| Apbb1ip  | 1.87641768 | 5.43E-22 | 8.63E-20 | yes | -   |
| Nkx3-2   | 1.8640622  | 3.15E-04 | 4.02E-03 | yes | -   |
| Liph     | 1.8629888  | 1.92E-03 | 1.83E-02 | -   | -   |
| Fam43a   | 1.86132889 | 1.06E-11 | 5.66E-10 | -   | -   |
| Gspt2    | 1.86027512 | 1.42E-03 | 1.43E-02 | yes | -   |
| Cd24a    | 1.85553858 | 6.65E-27 | 1.45E-24 | -   | -   |
| Arhgef9  | 1.85318768 | 1.24E-07 | 3.59E-06 | yes | -   |
| Stc1     | 1.8510938  | 9.13E-05 | 1.37E-03 | -   | -   |
| Xkrx     | 1.85085131 | 4.76E-04 | 5.72E-03 | -   | -   |
| Adamts1  | 1.8496291  | 3.35E-19 | 4.04E-17 | yes | -   |
| Npy1r    | 1.84446447 | 2.77E-12 | 1.60E-10 | yes | -   |
| Tle2     | 1.84414104 | 5.81E-10 | 2.47E-08 | yes | -   |
| Lrrc15   | 1.8439212  | 5.88E-04 | 6.85E-03 | -   | -   |
| Cacnb2   | 1.84268696 | 1.26E-06 | 3.03E-05 | yes | -   |
| Fgf7     | 1.83955397 | 3.21E-14 | 2.21E-12 | yes | -   |
| Mme      | 1.83767163 | 4.74E-09 | 1.78E-07 | yes | -   |
| Clu      | 1.83679166 | 2.32E-12 | 1.35E-10 | yes | -   |
| Prkar2b  | 1.83613483 | 1.30E-09 | 5.25E-08 | yes | -   |
| Pde8b    | 1.83526196 | 4.34E-10 | 1.87E-08 | yes | -   |
| Prss35   | 1.83453954 | 1.40E-03 | 1.42E-02 | -   | -   |
| Npr2     | 1.83055612 | 2.33E-08 | 7.82E-07 | yes | -   |
| Serpi-3i | 1.82939549 | 3.30E-28 | 7.72E-26 | -   | -   |
| Kif21b   | 1.82362868 | 8.74E-07 | 2.17E-05 | -   | -   |
| Cdh17    | 1.82353767 | 2.00E-03 | 1.89E-02 | yes | -   |
| Adgre5   | 1.82081077 | 1.18E-10 | 5.59E-09 | -   | -   |
| Cd248    | 1.82013821 | 7.40E-18 | 8.06E-16 | -   | -   |
| Ppm1e    | 1.81934986 | 8.52E-04 | 9.37E-03 | yes | yes |

|          |            |          |          |     |     |
|----------|------------|----------|----------|-----|-----|
| Cac-1a   | 1.81648821 | 1.52E-05 | 2.81E-04 | yes | -   |
| Tnik     | 1.81560706 | 7.39E-08 | 2.23E-06 | yes | -   |
| Adra1d   | 1.81112736 | 7.26E-12 | 3.95E-10 | yes | -   |
| Glit8d2  | 1.81003174 | 8.83E-06 | 1.73E-04 | -   | -   |
| Rgma     | 1.80855441 | 4.20E-10 | 1.82E-08 | yes | -   |
| Plau     | 1.80185136 | 1.21E-14 | 8.87E-13 | yes | -   |
| Fabp4    | 1.79918558 | 1.61E-03 | 1.58E-02 | yes | -   |
| Loxl4    | 1.79553155 | 2.06E-17 | 2.11E-15 | yes | yes |
| Scn2a1   | 1.79431726 | 2.79E-03 | 2.49E-02 | -   | -   |
| Prickle1 | 1.78846514 | 1.28E-16 | 1.16E-14 | yes | -   |
| Slc7a3   | 1.78589591 | 1.25E-05 | 2.37E-04 | -   | -   |
| B3galt1  | 1.78485021 | 1.18E-08 | 4.14E-07 | yes | -   |
| S-i2     | 1.78323026 | 9.31E-06 | 1.81E-04 | yes | -   |
| Egr2     | 1.76909804 | 8.18E-04 | 9.10E-03 | yes | -   |
| Ptges    | 1.76706609 | 7.43E-04 | 8.37E-03 | yes | -   |
| Hoxb6    | 1.76303852 | 1.29E-10 | 6.03E-09 | yes | -   |
| Bnc2     | 1.76161542 | 9.63E-05 | 1.43E-03 | yes | -   |
| Pde3a    | 1.75977258 | 4.52E-04 | 5.48E-03 | yes | -   |
| Pdgfrb   | 1.7587568  | 3.90E-19 | 4.59E-17 | yes | yes |
| Adssl1   | 1.75774769 | 1.21E-03 | 1.25E-02 | yes | -   |
| Gas1     | 1.75425199 | 1.01E-16 | 9.35E-15 | yes | -   |
| Slc14a1  | 1.75170641 | 6.58E-04 | 7.50E-03 | -   | -   |
| Atp9a    | 1.74517656 | 1.06E-05 | 2.04E-04 | -   | -   |
| Synpo2   | 1.74488747 | 5.94E-04 | 6.90E-03 | -   | -   |
| Rgcc     | 1.74079462 | 5.57E-04 | 6.53E-03 | -   | -   |
| Epb41l3  | 1.74004305 | 1.95E-44 | 1.19E-41 | yes | -   |
| Ccdc85a  | 1.73914835 | 4.34E-04 | 5.30E-03 | yes | -   |
| Parp3    | 1.73905191 | 5.25E-06 | 1.08E-04 | yes | -   |
| Shc2     | 1.73838424 | 1.39E-09 | 5.60E-08 | yes | -   |
| Gpr176   | 1.73823483 | 6.32E-26 | 1.32E-23 | -   | -   |
| Podnl1   | 1.73698946 | 7.43E-07 | 1.87E-05 | -   | -   |
| Fgf10    | 1.73352663 | 3.19E-08 | 1.04E-06 | yes | -   |

|          |            |          |          |     |     |
|----------|------------|----------|----------|-----|-----|
| Zfp361l  | 1.72941967 | 7.11E-18 | 7.85E-16 | yes | yes |
| Aldh5a1  | 1.72470306 | 2.05E-07 | 5.68E-06 | yes | -   |
| Cln3     | 1.72345664 | 1.28E-04 | 1.84E-03 | -   | -   |
| Vwa5a    | 1.7227651  | 2.73E-06 | 6.04E-05 | -   | -   |
| Hoxaas3  | 1.71901365 | 3.28E-04 | 4.15E-03 | -   | -   |
| Gdpd2    | 1.71633361 | 5.63E-08 | 1.74E-06 | yes | -   |
| Wnk4     | 1.71470929 | 3.46E-06 | 7.46E-05 | yes | -   |
| Apobr    | 1.71413175 | 1.03E-04 | 1.52E-03 | -   | -   |
| Sema6c   | 1.71304969 | 2.94E-05 | 4.99E-04 | -   | -   |
| Pygl     | 1.71302594 | 5.88E-05 | 9.26E-04 | yes | -   |
| Chst2    | 1.71210597 | 8.11E-06 | 1.60E-04 | -   | -   |
| Rassf6   | 1.71196831 | 4.74E-08 | 1.49E-06 | -   | -   |
| Nrep     | 1.70900308 | 2.33E-09 | 9.07E-08 | -   | -   |
| Lancl3   | 1.70495422 | 2.93E-05 | 4.99E-04 | -   | -   |
| Creb3l1  | 1.70419686 | 1.59E-10 | 7.28E-09 | yes | -   |
| Hoxb7    | 1.70230436 | 3.35E-07 | 8.87E-06 | yes | -   |
| Pcdh20   | 1.70152813 | 1.37E-03 | 1.39E-02 | -   | -   |
| Ank2     | 1.70147623 | 9.46E-06 | 1.84E-04 | yes | -   |
| Ccdc109b | 1.69914385 | 2.35E-04 | 3.13E-03 | yes | -   |
| Bmpr1b   | 1.69663355 | 2.34E-11 | 1.20E-09 | yes | -   |
| Lgi2     | 1.69579879 | 1.85E-09 | 7.30E-08 | -   | yes |
| D-jc12   | 1.69535571 | 1.18E-05 | 2.24E-04 | -   | -   |
| Calcr1   | 1.69418333 | 4.88E-05 | 7.86E-04 | yes | -   |
| Ccbe1    | 1.69295779 | 1.17E-05 | 2.22E-04 | yes | -   |
| P2rx5    | 1.69125359 | 2.63E-03 | 2.38E-02 | -   | -   |
| Il6ra    | 1.69012506 | 3.64E-06 | 7.77E-05 | -   | -   |
| D-af3    | 1.68870813 | 9.08E-04 | 9.92E-03 | -   | -   |
| Paqr8    | 1.68772284 | 1.37E-05 | 2.55E-04 | -   | -   |
| Dhrs9    | 1.683526   | 4.93E-08 | 1.55E-06 | -   | -   |
| Peli2    | 1.67984835 | 2.58E-07 | 6.98E-06 | yes | -   |
| Bgn      | 1.67974123 | 3.20E-15 | 2.50E-13 | yes | -   |
| Map3k7cl | 1.67940711 | 3.15E-04 | 4.02E-03 | -   | -   |

|          |            |          |          |     |     |
|----------|------------|----------|----------|-----|-----|
| Acyp2    | 1.67940595 | 9.74E-07 | 2.39E-05 | yes | -   |
| Adamts12 | 1.67737354 | 1.66E-04 | 2.31E-03 | yes | -   |
| Galnt18  | 1.67713637 | 1.18E-07 | 3.42E-06 | -   | -   |
| Fst      | 1.67690156 | 3.20E-12 | 1.85E-10 | yes | -   |
| Rad9b    | 1.67493836 | 3.28E-04 | 4.15E-03 | yes | -   |
| Fmnl2    | 1.67343092 | 3.63E-15 | 2.80E-13 | yes | -   |
| Gareml   | 1.67171163 | 8.57E-07 | 2.13E-05 | -   | -   |
| Dgkh     | 1.66859173 | 1.11E-07 | 3.26E-06 | yes | yes |
| Cemip    | 1.66697446 | 8.68E-08 | 2.59E-06 | -   | -   |
| Xkr5     | 1.66679075 | 1.36E-04 | 1.94E-03 | -   | -   |
| Zfp521   | 1.66587136 | 2.04E-22 | 3.34E-20 | -   | -   |
| Layn     | 1.66521793 | 2.43E-06 | 5.43E-05 | -   | -   |
| Mrc2     | 1.66180027 | 9.09E-25 | 1.78E-22 | yes | -   |
| Masp1    | 1.65989962 | 2.91E-14 | 2.03E-12 | yes | -   |
| Ptp4a3   | 1.65916113 | 4.69E-05 | 7.60E-04 | yes | -   |
| Ctso     | 1.65789886 | 1.27E-05 | 2.38E-04 | -   | -   |
| Tle1     | 1.65530263 | 1.34E-07 | 3.84E-06 | yes | -   |
| Pcdhgb6  | 1.65482425 | 1.44E-24 | 2.76E-22 | -   | -   |
| Wasf3    | 1.65441939 | 2.58E-06 | 5.73E-05 | yes | -   |
| Slco3a1  | 1.65339107 | 3.37E-05 | 5.65E-04 | yes | -   |
| Cxcl12   | 1.64990619 | 1.65E-15 | 1.31E-13 | yes | -   |
| Eil2     | 1.64757941 | 2.33E-19 | 2.87E-17 | yes | yes |
| Ypel4    | 1.64484997 | 4.16E-04 | 5.12E-03 | -   | -   |
| Ank3     | 1.64437005 | 5.15E-04 | 6.12E-03 | yes | yes |
| Ppap2b   | 1.64347556 | 3.96E-13 | 2.44E-11 | yes | -   |
| Mdk      | 1.64022417 | 7.96E-06 | 1.57E-04 | yes | -   |
| Tcp11l2  | 1.6399536  | 1.90E-04 | 2.60E-03 | -   | -   |
| Amot     | 1.63961262 | 9.35E-07 | 2.31E-05 | yes | yes |
| Ikzf4    | 1.6394842  | 1.57E-03 | 1.54E-02 | yes | yes |
| Ptpdc1   | 1.63908083 | 1.04E-07 | 3.04E-06 | -   | -   |
| Cdsn     | 1.63782703 | 1.42E-06 | 3.37E-05 | yes | -   |
| Cep85l   | 1.63689979 | 8.38E-04 | 9.27E-03 | -   | -   |

|          |            |          |          |     |     |
|----------|------------|----------|----------|-----|-----|
| Lipa     | 1.63639383 | 1.41E-16 | 1.27E-14 | -   | -   |
| Npr3     | 1.63326399 | 5.42E-09 | 2.02E-07 | yes | -   |
| Hoxaas2  | 1.63176579 | 3.89E-04 | 4.83E-03 | -   | -   |
| Stambpl1 | 1.63066112 | 6.20E-06 | 1.26E-04 | yes | -   |
| Phlpp1   | 1.62967355 | 2.28E-14 | 1.61E-12 | -   | -   |
| Tmem86a  | 1.62963176 | 3.23E-04 | 4.11E-03 | -   | yes |
| Gatsl2   | 1.62789991 | 4.10E-13 | 2.51E-11 | -   | -   |
| Efhc1    | 1.62749149 | 4.28E-04 | 5.24E-03 | yes | -   |
| Epha1    | 1.62638859 | 8.94E-19 | 1.03E-16 | yes | -   |
| Tbkbp1   | 1.624453   | 1.61E-09 | 6.45E-08 | yes | -   |
| Mr1      | 1.62255682 | 9.65E-06 | 1.87E-04 | yes | -   |
| Mmp3     | 1.62161912 | 1.07E-03 | 1.13E-02 | yes | -   |
| Acacb    | 1.62124598 | 2.84E-04 | 3.67E-03 | yes | -   |
| Cac-1c   | 1.61990813 | 2.00E-04 | 2.71E-03 | yes | -   |
| Irgm2    | 1.61910102 | 8.38E-05 | 1.27E-03 | -   | -   |
| Mtmr11   | 1.61869032 | 1.62E-07 | 4.58E-06 | yes | -   |
| Plcb1    | 1.61859719 | 9.46E-04 | 1.03E-02 | yes | -   |
| Dennd4b  | 1.61815522 | 1.99E-03 | 1.88E-02 | -   | -   |
| Tle6     | 1.61759675 | 4.87E-04 | 5.83E-03 | yes | -   |
| Pcdhb16  | 1.61614316 | 2.84E-04 | 3.67E-03 | -   | -   |
| BC028528 | 1.61588553 | 8.70E-04 | 9.57E-03 | -   | -   |
| Dync2li1 | 1.615114   | 1.93E-06 | 4.41E-05 | yes | -   |
| Glrb     | 1.6139065  | 7.64E-04 | 8.58E-03 | yes | -   |
| Prss22   | 1.61355639 | 6.12E-04 | 7.06E-03 | -   | -   |
| Hvcn1    | 1.61197347 | 3.10E-06 | 6.77E-05 | yes | -   |
| Sema4g   | 1.60655347 | 8.20E-04 | 9.11E-03 | yes | -   |
| Arhgap6  | 1.60308953 | 2.15E-04 | 2.88E-03 | -   | -   |
| Tspyl4   | 1.59965523 | 4.64E-07 | 1.21E-05 | yes | -   |
| Glrx     | 1.59934258 | 1.25E-08 | 4.38E-07 | yes | -   |
| Pxylp1   | 1.59751004 | 8.52E-08 | 2.54E-06 | -   | -   |
| C1galt1  | 1.59750672 | 7.59E-13 | 4.55E-11 | yes | -   |
| Cdkl3    | 1.59654919 | 7.92E-06 | 1.57E-04 | yes | -   |

|         |            |          |          |     |   |
|---------|------------|----------|----------|-----|---|
| Deptor  | 1.59650492 | 1.06E-06 | 2.57E-05 | -   | - |
| Zcwpw1  | 1.59584441 | 1.37E-03 | 1.39E-02 | -   | - |
| Tspan18 | 1.59184073 | 9.79E-04 | 1.05E-02 | -   | - |
| Ddit4   | 1.5914568  | 2.34E-03 | 2.15E-02 | yes | - |
| Tmem173 | 1.59035738 | 1.29E-14 | 9.44E-13 | yes | - |
| Adm     | 1.58835347 | 3.12E-06 | 6.82E-05 | yes | - |
| Slc1a4  | 1.5882775  | 1.30E-15 | 1.05E-13 | yes | - |
| Glb1l   | 1.58488922 | 1.43E-05 | 2.65E-04 | -   | - |
| Wbscr17 | 1.58360771 | 4.42E-08 | 1.40E-06 | -   | - |
| Arsg    | 1.58176579 | 2.60E-03 | 2.35E-02 | -   | - |
| Pkd2    | 1.58035974 | 1.79E-11 | 9.30E-10 | yes | - |
| Fam229b | 1.57924609 | 1.17E-03 | 1.22E-02 | -   | - |
| Lactb   | 1.57720698 | 1.05E-06 | 2.55E-05 | yes | - |
| Stat5a  | 1.57709219 | 4.13E-04 | 5.09E-03 | yes | - |
| Dnm1    | 1.57676975 | 2.15E-03 | 2.01E-02 | yes | - |
| Il13ra1 | 1.57599177 | 3.60E-08 | 1.16E-06 | yes | - |
| Arhgef4 | 1.57460067 | 4.60E-04 | 5.55E-03 | yes | - |
| Ccl7    | 1.57446752 | 2.66E-05 | 4.57E-04 | yes | - |
| Hoxb4   | 1.57278776 | 1.29E-13 | 8.42E-12 | yes | - |
| Sertad3 | 1.57219918 | 6.11E-06 | 1.24E-04 | yes | - |
| Nptxr   | 1.57098565 | 2.11E-03 | 1.97E-02 | yes | - |
| Has2    | 1.57082776 | 1.25E-07 | 3.60E-06 | yes | - |
| Zfp563  | 1.56978829 | 1.09E-03 | 1.15E-02 | -   | - |
| Fancf   | 1.56880061 | 1.47E-03 | 1.47E-02 | yes | - |
| Steap3  | 1.56804178 | 1.47E-07 | 4.19E-06 | yes | - |
| Fyco1   | 1.56742998 | 3.72E-05 | 6.16E-04 | -   | - |
| Osmr    | 1.56666965 | 2.78E-05 | 4.77E-04 | yes | - |
| Cpt1a   | 1.56562967 | 5.04E-33 | 1.54E-30 | yes | - |
| Rassf2  | 1.56462942 | 1.02E-09 | 4.18E-08 | yes | - |
| Nqo1    | 1.56445591 | 1.93E-06 | 4.40E-05 | yes | - |
| Abcd4   | 1.56332096 | 1.31E-12 | 7.76E-11 | yes | - |
| Rdh10   | 1.56100699 | 1.47E-05 | 2.72E-04 | yes | - |

|          |            |          |          |     |     |
|----------|------------|----------|----------|-----|-----|
| Hspa1b   | 1.56021949 | 9.61E-04 | 1.04E-02 | yes | -   |
| Rtkn2    | 1.55955453 | 8.12E-09 | 2.93E-07 | -   | yes |
| Ropn1l   | 1.55906708 | 7.31E-04 | 8.26E-03 | yes | -   |
| Hoxb3    | 1.55863811 | 1.90E-05 | 3.43E-04 | yes | -   |
| Clcn5    | 1.55723751 | 1.27E-06 | 3.04E-05 | yes | yes |
| Bbs7     | 1.55483447 | 5.37E-04 | 6.34E-03 | yes | -   |
| Iglon5   | 1.5547849  | 4.59E-08 | 1.46E-06 | -   | -   |
| Lrrc8d   | 1.55369035 | 2.95E-06 | 6.46E-05 | yes | -   |
| Satb1    | 1.5525589  | 1.18E-09 | 4.79E-08 | yes | -   |
| Celf4    | 1.54871642 | 4.96E-07 | 1.29E-05 | -   | -   |
| Gpr162   | 1.54586143 | 4.72E-04 | 5.69E-03 | -   | -   |
| Apcdd1   | 1.54545538 | 2.80E-11 | 1.42E-09 | -   | -   |
| Abhd14b  | 1.54461255 | 5.49E-08 | 1.71E-06 | -   | -   |
| Lxn      | 1.5396314  | 4.14E-04 | 5.10E-03 | yes | -   |
| Clip4    | 1.53894428 | 4.50E-04 | 5.46E-03 | yes | -   |
| Gcnt3    | 1.53831292 | 3.70E-04 | 4.62E-03 | yes | -   |
| Airn     | 1.53741644 | 1.13E-03 | 1.18E-02 | -   | -   |
| Itga2b   | 1.53011703 | 4.12E-04 | 5.09E-03 | yes | -   |
| Fam171b  | 1.52974374 | 1.50E-03 | 1.49E-02 | -   | -   |
| Colec12  | 1.52960803 | 4.35E-07 | 1.14E-05 | yes | -   |
| Lgalsl   | 1.52642214 | 2.07E-03 | 1.95E-02 | -   | -   |
| Arhgap28 | 1.52485071 | 1.41E-05 | 2.62E-04 | -   | -   |
| Hdgfrp3  | 1.52182556 | 7.21E-09 | 2.63E-07 | yes | -   |
| Zcchc24  | 1.52147856 | 7.47E-10 | 3.13E-08 | -   | -   |
| Ech1     | 1.52139841 | 1.00E-08 | 3.56E-07 | yes | -   |
| Pitpnc1  | 1.52136466 | 3.41E-05 | 5.71E-04 | yes | -   |
| Ror2     | 1.52113374 | 1.45E-06 | 3.42E-05 | yes | -   |
| Ppfia3   | 1.51989536 | 1.32E-03 | 1.35E-02 | yes | -   |
| Vsig10l  | 1.51926128 | 3.82E-05 | 6.28E-04 | -   | -   |
| Tmem119  | 1.5183117  | 3.95E-05 | 6.47E-04 | -   | -   |
| Nid2     | 1.51794866 | 4.65E-09 | 1.75E-07 | yes | yes |
| 5-Sep    | 1.5170283  | 5.90E-08 | 1.81E-06 | yes | -   |

|         |            |          |          |     |     |
|---------|------------|----------|----------|-----|-----|
| Pde4d   | 1.5164774  | 7.22E-09 | 2.63E-07 | yes | -   |
| Ttc7b   | 1.51566929 | 1.42E-09 | 5.68E-08 | -   | -   |
| Bahcc1  | 1.51522391 | 1.63E-04 | 2.28E-03 | yes | -   |
| Shc4    | 1.51484271 | 2.26E-03 | 2.09E-02 | -   | -   |
| Manea   | 1.51438917 | 7.61E-06 | 1.52E-04 | -   | -   |
| Gfpt2   | 1.51274624 | 2.07E-11 | 1.07E-09 | yes | -   |
| Orai3   | 1.51156708 | 3.62E-05 | 6.01E-04 | -   | -   |
| Spp1    | 1.51145288 | 6.78E-04 | 7.71E-03 | yes | -   |
| Fam234b | 1.51077833 | 2.01E-04 | 2.73E-03 | -   | -   |
| Gpr153  | 1.50865194 | 4.45E-04 | 5.42E-03 | -   | -   |
| Akt3    | 1.50853482 | 5.94E-04 | 6.90E-03 | yes | yes |
| Cradd   | 1.50827135 | 2.97E-05 | 5.05E-04 | yes | -   |
| Maml3   | 1.50819607 | 2.44E-05 | 4.24E-04 | yes | -   |
| Gpsm2   | 1.50697867 | 8.66E-05 | 1.30E-03 | yes | -   |
| Elavl2  | 1.50511633 | 1.06E-03 | 1.12E-02 | yes | -   |
| Bambi   | 1.50455203 | 2.28E-03 | 2.11E-02 | yes | -   |
| Hspb6   | 1.50314377 | 1.57E-05 | 2.87E-04 | yes | -   |
| Lace1   | 1.50264374 | 1.58E-04 | 2.22E-03 | yes | -   |
| Ampd3   | 1.50207516 | 7.39E-04 | 8.34E-03 | yes | -   |
| Usp11   | 1.5001804  | 1.36E-03 | 1.38E-02 | yes | -   |
| Thbs3   | 1.4998612  | 3.36E-06 | 7.27E-05 | yes | -   |
| Kank3   | 1.49645718 | 1.96E-03 | 1.86E-02 | -   | -   |
| Hacl1   | 1.49256007 | 1.06E-04 | 1.56E-03 | yes | -   |
| Gcnt4   | 1.49233145 | 9.67E-04 | 1.04E-02 | yes | -   |
| Pcdhb22 | 1.49215251 | 1.56E-03 | 1.54E-02 | -   | -   |
| Cgref1  | 1.49056987 | 1.54E-04 | 2.17E-03 | -   | -   |
| Fig4    | 1.49030333 | 3.99E-17 | 3.99E-15 | -   | -   |
| Pigp    | 1.48986334 | 6.78E-05 | 1.05E-03 | yes | -   |
| Ltbp2   | 1.48981067 | 1.24E-05 | 2.34E-04 | yes | -   |
| Gas7    | 1.48964442 | 1.39E-08 | 4.85E-07 | yes | yes |
| Cfh     | 1.4866613  | 2.98E-04 | 3.83E-03 | yes | -   |
| Prcp    | 1.48644904 | 9.12E-09 | 3.27E-07 | yes | -   |

|         |            |          |          |     |     |
|---------|------------|----------|----------|-----|-----|
| Slc9a6  | 1.48610186 | 1.30E-03 | 1.33E-02 | yes | -   |
| Socs2   | 1.48599061 | 2.11E-06 | 4.75E-05 | yes | -   |
| Pvrl3   | 1.48326462 | 4.82E-04 | 5.78E-03 | yes | -   |
| Pik3r5  | 1.48182184 | 4.23E-06 | 8.92E-05 | yes | -   |
| Kbtbd7  | 1.48036097 | 5.30E-04 | 6.28E-03 | yes | -   |
| Rnf24   | 1.47859609 | 1.36E-07 | 3.91E-06 | yes | -   |
| Sgk1    | 1.4781616  | 1.15E-06 | 2.77E-05 | -   | yes |
| Insig2  | 1.4778645  | 2.27E-05 | 3.99E-04 | yes | -   |
| Sema3e  | 1.47752649 | 2.96E-13 | 1.87E-11 | yes | -   |
| Gramd1b | 1.47730018 | 1.34E-03 | 1.37E-02 | -   | -   |
| Gda     | 1.47366132 | 5.44E-04 | 6.40E-03 | yes | -   |
| Fggy    | 1.47338862 | 1.17E-03 | 1.21E-02 | -   | -   |
| Bcl6    | 1.47174018 | 1.70E-07 | 4.78E-06 | yes | -   |
| Pak1    | 1.46969623 | 1.00E-07 | 2.95E-06 | yes | -   |
| Egr1    | 1.46933973 | 9.46E-04 | 1.03E-02 | yes | -   |
| Foxf1   | 1.46925927 | 7.33E-05 | 1.13E-03 | -   | -   |
| Pknox2  | 1.4673103  | 2.50E-03 | 2.28E-02 | yes | yes |
| Dact3   | 1.46414354 | 7.97E-05 | 1.21E-03 | -   | -   |
| Plekhn1 | 1.46340491 | 5.95E-05 | 9.34E-04 | yes | -   |
| Pappa   | 1.46330652 | 1.02E-03 | 1.08E-02 | yes | -   |
| Snx32   | 1.46302254 | 1.26E-05 | 2.37E-04 | -   | -   |
| Arsb    | 1.46120035 | 1.93E-09 | 7.60E-08 | yes | yes |
| Erbp2ip | 1.46079932 | 2.12E-03 | 1.98E-02 | yes | -   |
| Hmga2   | 1.46031439 | 1.09E-06 | 2.65E-05 | yes | -   |
| Pcbp3   | 1.45804374 | 9.72E-04 | 1.05E-02 | yes | -   |
| Ctsp2   | 1.4556061  | 2.11E-09 | 8.27E-08 | yes | -   |
| Pbx1    | 1.45528125 | 1.66E-04 | 2.31E-03 | yes | -   |
| D-ja4   | 1.45460052 | 2.20E-03 | 2.05E-02 | yes | -   |
| Mb21d1  | 1.45105681 | 1.02E-03 | 1.08E-02 | -   | -   |
| Adam22  | 1.4490677  | 2.73E-03 | 2.44E-02 | yes | -   |
| Foxc1   | 1.44891403 | 4.09E-06 | 8.67E-05 | yes | -   |
| Cbx7    | 1.44803854 | 3.14E-05 | 5.28E-04 | yes | -   |

|         |            |          |          |     |     |
|---------|------------|----------|----------|-----|-----|
| Gm7120  | 1.4465107  | 4.38E-04 | 5.35E-03 | -   | -   |
| Lppr2   | 1.44492138 | 3.23E-04 | 4.10E-03 | -   | -   |
| Gng7    | 1.44484627 | 1.31E-04 | 1.88E-03 | yes | -   |
| Pak3    | 1.44388116 | 3.07E-05 | 5.18E-04 | yes | -   |
| Glis3   | 1.44279067 | 6.95E-04 | 7.88E-03 | yes | yes |
| Vwa8    | 1.44206581 | 3.40E-12 | 1.95E-10 | -   | -   |
| Trim71  | 1.44186691 | 2.00E-04 | 2.71E-03 | -   | -   |
| Srl     | 1.43753691 | 2.75E-03 | 2.46E-02 | -   | -   |
| Lrsam1  | 1.437242   | 2.40E-03 | 2.20E-02 | yes | -   |
| Acox3   | 1.43688639 | 2.06E-04 | 2.78E-03 | yes | -   |
| Acp2    | 1.43622223 | 6.56E-04 | 7.49E-03 | yes | -   |
| Mbnl1   | 1.43610775 | 5.35E-04 | 6.33E-03 | yes | -   |
| Cdk14   | 1.43585593 | 3.59E-05 | 5.97E-04 | -   | -   |
| Tbccd1  | 1.43553151 | 2.51E-09 | 9.70E-08 | -   | -   |
| Stat3   | 1.43283651 | 1.74E-06 | 4.01E-05 | yes | yes |
| Emc2    | 1.43278883 | 3.95E-07 | 1.04E-05 | -   | -   |
| Phyhd1  | 1.43203227 | 5.87E-05 | 9.25E-04 | -   | -   |
| Sema3a  | 1.43200646 | 1.79E-09 | 7.10E-08 | yes | -   |
| Il4ra   | 1.43113225 | 6.77E-05 | 1.05E-03 | -   | -   |
| Fut10   | 1.43009006 | 2.67E-13 | 1.70E-11 | -   | -   |
| Sox9    | 1.42973027 | 2.69E-06 | 5.95E-05 | yes | -   |
| Socs5   | 1.42869306 | 3.39E-15 | 2.63E-13 | yes | -   |
| Abhd4   | 1.42858809 | 1.04E-10 | 5.01E-09 | yes | yes |
| Slco2a1 | 1.4282277  | 9.32E-08 | 2.76E-06 | yes | -   |
| Nudt13  | 1.42648047 | 1.12E-03 | 1.18E-02 | -   | -   |
| Scd1    | 1.42480847 | 2.80E-07 | 7.54E-06 | -   | -   |
| Adgrl2  | 1.42383602 | 1.51E-04 | 2.13E-03 | -   | -   |
| Six4    | 1.4220784  | 1.42E-04 | 2.02E-03 | yes | -   |
| Kctd5   | 1.41929944 | 3.63E-08 | 1.17E-06 | yes | yes |
| Relt    | 1.41897778 | 1.44E-03 | 1.44E-02 | -   | -   |
| Srgap1  | 1.41892074 | 1.43E-06 | 3.38E-05 | yes | -   |
| Mtss1l  | 1.41879092 | 6.11E-04 | 7.06E-03 | -   | yes |

|          |            |          |          |     |   |
|----------|------------|----------|----------|-----|---|
| Kcnd1    | 1.41534327 | 1.75E-07 | 4.88E-06 | yes | - |
| Tsku     | 1.41440767 | 8.26E-17 | 7.77E-15 | yes | - |
| C1rl     | 1.41381661 | 1.07E-04 | 1.57E-03 | yes | - |
| Frmd5    | 1.41377741 | 2.62E-03 | 2.37E-02 | yes | - |
| Eps8     | 1.4129163  | 2.34E-08 | 7.84E-07 | yes | - |
| Efemp1   | 1.41035368 | 2.42E-11 | 1.24E-09 | yes | - |
| Ttyh3    | 1.40694702 | 4.03E-10 | 1.75E-08 | yes | - |
| Hsd17b11 | 1.40537584 | 4.24E-10 | 1.83E-08 | yes | - |
| Gypc     | 1.4053622  | 4.73E-08 | 1.49E-06 | yes | - |
| Zbtb12   | 1.40349021 | 8.85E-06 | 1.73E-04 | yes | - |
| Fam19a5  | 1.40279189 | 9.80E-04 | 1.05E-02 | -   | - |
| Clip2    | 1.40183155 | 1.04E-04 | 1.53E-03 | yes | - |
| Btg1     | 1.40010789 | 3.04E-05 | 5.13E-04 | yes | - |
| Wdr34    | 1.39969161 | 6.56E-04 | 7.49E-03 | yes | - |
| Gpc4     | 1.39582493 | 4.59E-19 | 5.37E-17 | yes | - |
| Gabre    | 1.39304513 | 1.98E-03 | 1.87E-02 | -   | - |
| Azin2    | 1.39284527 | 1.53E-05 | 2.82E-04 | -   | - |
| Irak4    | 1.39264447 | 2.90E-04 | 3.74E-03 | yes | - |
| Tbc1d32  | 1.39145283 | 5.56E-04 | 6.53E-03 | -   | - |
| Fuz      | 1.39059278 | 2.50E-05 | 4.31E-04 | yes | - |
| Magee1   | 1.38988932 | 3.33E-05 | 5.59E-04 | yes | - |
| Eid1     | 1.38692137 | 8.01E-11 | 3.90E-09 | yes | - |
| Ctsb     | 1.38688292 | 1.01E-07 | 2.97E-06 | yes | - |
| Nedd4    | 1.38582492 | 3.12E-05 | 5.26E-04 | yes | - |
| Hoxb2    | 1.38382547 | 1.71E-03 | 1.66E-02 | yes | - |
| Arhgap18 | 1.38332486 | 1.39E-03 | 1.41E-02 | yes | - |
| Tspan5   | 1.38289824 | 4.04E-08 | 1.29E-06 | yes | - |
| Cpt1c    | 1.38222933 | 8.23E-07 | 2.04E-05 | yes | - |
| Adgrg6   | 1.3808073  | 2.13E-04 | 2.86E-03 | -   | - |
| Cntln    | 1.38079773 | 5.26E-04 | 6.23E-03 | -   | - |
| Rasgef1b | 1.38070203 | 1.44E-03 | 1.45E-02 | -   | - |
| Tshz1    | 1.38066757 | 1.46E-10 | 6.73E-09 | -   | - |

|          |            |          |          |     |     |
|----------|------------|----------|----------|-----|-----|
| Ctdsp2   | 1.37776229 | 2.54E-17 | 2.57E-15 | yes | yes |
| Stom     | 1.37477546 | 2.34E-05 | 4.10E-04 | yes | -   |
| Ralgds   | 1.37460966 | 2.50E-05 | 4.31E-04 | yes | -   |
| Wls      | 1.37341345 | 1.41E-03 | 1.42E-02 | -   | -   |
| Sptbn1   | 1.37333254 | 1.76E-06 | 4.06E-05 | yes | -   |
| Gbp2     | 1.3730232  | 3.58E-04 | 4.50E-03 | yes | -   |
| F3       | 1.37262734 | 7.14E-22 | 1.10E-19 | yes | -   |
| Capn5    | 1.37242185 | 2.37E-04 | 3.14E-03 | -   | -   |
| Phyh     | 1.37215932 | 6.66E-05 | 1.04E-03 | yes | -   |
| Hpse     | 1.37212603 | 4.52E-04 | 5.48E-03 | yes | -   |
| Mapk13   | 1.37177037 | 9.47E-04 | 1.03E-02 | yes | -   |
| Sc5d     | 1.37068589 | 5.77E-04 | 6.75E-03 | -   | -   |
| Pik3r1   | 1.37060894 | 1.90E-13 | 1.22E-11 | yes | yes |
| Cdc42ep4 | 1.37003904 | 1.66E-03 | 1.62E-02 | yes | -   |
| Tmem50b  | 1.36939723 | 2.75E-04 | 3.58E-03 | -   | -   |
| Epb41l2  | 1.36718455 | 9.08E-05 | 1.36E-03 | yes | -   |
| Tiam2    | 1.36718171 | 2.64E-06 | 5.87E-05 | yes | -   |
| Zadh2    | 1.36450436 | 5.08E-12 | 2.83E-10 | yes | -   |
| Aldh1l2  | 1.36361937 | 3.12E-04 | 3.99E-03 | -   | -   |
| Cc2d2a   | 1.36337837 | 2.19E-04 | 2.94E-03 | -   | -   |
| Enpp5    | 1.36316859 | 2.59E-08 | 8.58E-07 | -   | -   |
| Rnf150   | 1.36274346 | 2.59E-03 | 2.35E-02 | -   | -   |
| Insig1   | 1.36185679 | 2.08E-08 | 7.05E-07 | yes | yes |
| Rnpep    | 1.3610905  | 9.19E-05 | 1.37E-03 | yes | -   |
| Lrrcc1   | 1.36091315 | 7.10E-04 | 8.05E-03 | yes | -   |
| Nrbp2    | 1.36005029 | 4.83E-06 | 1.01E-04 | yes | -   |
| Osbpl1a  | 1.35890443 | 6.34E-04 | 7.29E-03 | yes | -   |
| Stoml1   | 1.35770778 | 1.67E-05 | 3.05E-04 | yes | -   |
| Lamp2    | 1.35666827 | 9.07E-04 | 9.92E-03 | yes | -   |
| Fer      | 1.35641628 | 6.85E-12 | 3.74E-10 | yes | -   |
| Dtx4     | 1.35601205 | 3.80E-05 | 6.27E-04 | -   | yes |
| Wdr19    | 1.35542473 | 1.91E-04 | 2.61E-03 | -   | -   |

|          |            |          |          |     |     |
|----------|------------|----------|----------|-----|-----|
| Reck     | 1.35514479 | 1.98E-04 | 2.70E-03 | yes | -   |
| Scd2     | 1.35393455 | 5.41E-07 | 1.39E-05 | -   | -   |
| Meis1    | 1.35339222 | 1.74E-05 | 3.16E-04 | yes | -   |
| Ids      | 1.35289981 | 5.71E-05 | 9.02E-04 | yes | -   |
| Lgals3bp | 1.35271883 | 2.02E-06 | 4.59E-05 | yes | -   |
| Rb1cc1   | 1.35240664 | 5.25E-04 | 6.23E-03 | yes | -   |
| B4galt5  | 1.35235602 | 1.06E-03 | 1.12E-02 | yes | -   |
| Pfn2     | 1.35178152 | 1.12E-07 | 3.27E-06 | yes | -   |
| Frs2     | 1.35169907 | 1.29E-04 | 1.86E-03 | yes | yes |
| Plekhb2  | 1.35150139 | 2.72E-09 | 1.04E-07 | yes | -   |
| Nt5dc2   | 1.35104245 | 5.40E-04 | 6.37E-03 | yes | -   |
| Irf9     | 1.35029254 | 2.80E-06 | 6.18E-05 | yes | -   |
| Phf7     | 1.34970302 | 7.56E-04 | 8.50E-03 | yes | -   |
| Shisa5   | 1.34816867 | 1.89E-03 | 1.81E-02 | -   | -   |
| Socs3    | 1.34788835 | 2.25E-07 | 6.16E-06 | yes | -   |
| Xpr1     | 1.34778745 | 2.22E-03 | 2.06E-02 | -   | -   |
| Hmgcs1   | 1.34682836 | 4.99E-08 | 1.57E-06 | yes | yes |
| Dock4    | 1.34667059 | 2.08E-03 | 1.96E-02 | yes | -   |
| Cthrc1   | 1.34659592 | 1.21E-03 | 1.25E-02 | -   | -   |
| Ppp2r3a  | 1.34522734 | 1.47E-03 | 1.47E-02 | yes | -   |
| Impact   | 1.34456081 | 7.60E-04 | 8.55E-03 | -   | -   |
| Ccdc80   | 1.34360773 | 2.04E-15 | 1.60E-13 | -   | -   |
| Rab32    | 1.34304068 | 2.94E-04 | 3.78E-03 | yes | -   |
| Foxp1    | 1.3424599  | 1.39E-06 | 3.31E-05 | yes | -   |
| Phf19    | 1.34197426 | 4.56E-04 | 5.52E-03 | yes | -   |
| Elk3     | 1.34109645 | 1.48E-07 | 4.24E-06 | yes | -   |
| Cfap69   | 1.34022479 | 5.56E-04 | 6.53E-03 | -   | -   |
| Adck1    | 1.340209   | 5.82E-06 | 1.19E-04 | yes | -   |
| Dhrs7    | 1.33978175 | 3.26E-04 | 4.13E-03 | yes | -   |
| Reep3    | 1.33967217 | 1.40E-05 | 2.60E-04 | yes | -   |
| Lnx2     | 1.33869286 | 1.81E-03 | 1.73E-02 | yes | -   |
| Pgm1     | 1.3367679  | 2.46E-05 | 4.27E-04 | yes | -   |

|          |            |          |          |     |     |
|----------|------------|----------|----------|-----|-----|
| Nr3c1    | 1.33593239 | 1.86E-04 | 2.55E-03 | yes | yes |
| Kremen1  | 1.33309907 | 2.50E-05 | 4.31E-04 | yes | -   |
| Elovl6   | 1.3310659  | 1.07E-04 | 1.56E-03 | -   | -   |
| Snn      | 1.33089615 | 5.69E-09 | 2.11E-07 | -   | -   |
| Ahcyl1   | 1.33064156 | 3.22E-07 | 8.56E-06 | yes | -   |
| Pacsin3  | 1.33028374 | 2.20E-03 | 2.05E-02 | yes | -   |
| Pdlim4   | 1.32736395 | 7.67E-06 | 1.53E-04 | yes | -   |
| Trabd2b  | 1.32514387 | 1.47E-03 | 1.47E-02 | -   | -   |
| Fopnl    | 1.32470856 | 2.00E-04 | 2.71E-03 | -   | -   |
| Syngap1  | 1.32388426 | 5.48E-04 | 6.44E-03 | yes | -   |
| Srr      | 1.32208231 | 6.74E-04 | 7.67E-03 | yes | -   |
| Foxg1    | 1.32010254 | 2.43E-04 | 3.21E-03 | yes | -   |
| Rnf139   | 1.31997628 | 4.16E-06 | 8.77E-05 | yes | -   |
| Dusp18   | 1.31894097 | 1.96E-04 | 2.68E-03 | -   | -   |
| Nrp1     | 1.31829478 | 4.80E-05 | 7.74E-04 | yes | -   |
| Rcan2    | 1.31713115 | 1.62E-07 | 4.59E-06 | yes | -   |
| Pear1    | 1.31681347 | 7.78E-06 | 1.54E-04 | -   | -   |
| Tmem65   | 1.31611176 | 4.09E-06 | 8.67E-05 | -   | yes |
| Tvp23a   | 1.31580071 | 1.54E-03 | 1.52E-02 | -   | -   |
| Srd5a3   | 1.31495825 | 2.20E-03 | 2.05E-02 | -   | -   |
| Pgpep1   | 1.31255875 | 2.51E-05 | 4.33E-04 | -   | -   |
| Adamts5  | 1.31197752 | 2.87E-13 | 1.82E-11 | yes | yes |
| Slc29a3  | 1.31050876 | 9.16E-04 | 9.99E-03 | -   | -   |
| Emp1     | 1.30974504 | 1.04E-04 | 1.53E-03 | yes | yes |
| Glt8d1   | 1.30956984 | 1.36E-04 | 1.95E-03 | -   | -   |
| Pdk4     | 1.30926579 | 1.03E-05 | 1.99E-04 | yes | yes |
| 8-Sep    | 1.30897088 | 4.67E-04 | 5.63E-03 | yes | -   |
| Fam114a1 | 1.30792063 | 2.86E-04 | 3.70E-03 | yes | -   |
| Glipr2   | 1.30738677 | 2.87E-07 | 7.71E-06 | -   | -   |
| Maged2   | 1.30295115 | 2.48E-06 | 5.52E-05 | yes | -   |
| Asap3    | 1.30228752 | 1.73E-03 | 1.67E-02 | -   | -   |
