# Supplementary material
Source: PubMed Central journal article supplement (PMC6895402)
Supplement: NIHMS1047331-supplement-Supplemental_Table_2.pdf [file NIHMS1047331-supplement-Supplemental_Table_2.pdf]

**Supplementary Table 2. Significantly downregulated genes in miR-29b knockdown cells upon rapamycin treatment in Tsc2<sup>-/-</sup> MEFs, as quantified by RNA-sequencing**

| Gene     | Fold change | pval     | padj     | In CI | TS Target |
|----------|-------------|----------|----------|-------|-----------|
| Zfp691   | 0.4990627   | 4.90E-05 | 7.88E-04 | -     | -         |
| Zmynd15  | 0.49820521  | 2.54E-04 | 3.34E-03 | -     | -         |
| Jph2     | 0.49808919  | 2.19E-06 | 4.93E-05 | yes   | -         |
| Slc16a2  | 0.49660373  | 6.40E-08 | 1.96E-06 | yes   | yes       |
| Glipr1   | 0.49585562  | 2.15E-09 | 8.40E-08 | -     | -         |
| Smoc1    | 0.4950297   | 7.09E-21 | 1.01E-18 | yes   | -         |
| Slc13a5  | 0.49148729  | 8.05E-04 | 9.00E-03 | -     | -         |
| Tnfsf18  | 0.49148047  | 3.05E-07 | 8.15E-06 | yes   | -         |
| Pcolce2  | 0.49104767  | 4.10E-13 | 2.51E-11 | -     | -         |
| Tmem171  | 0.48696129  | 1.98E-06 | 4.49E-05 | yes   | -         |
| Pcdh1    | 0.48646233  | 1.83E-05 | 3.31E-04 | yes   | -         |
| Edn1     | 0.48595108  | 7.03E-37 | 2.60E-34 | yes   | -         |
| Adra2a   | 0.48301336  | 2.23E-04 | 2.98E-03 | yes   | -         |
| Ptprb    | 0.48297319  | 5.15E-16 | 4.33E-14 | yes   | -         |
| Ccl20    | 0.48222555  | 1.96E-07 | 5.44E-06 | yes   | -         |
| Lbh      | 0.48093272  | 2.51E-31 | 6.88E-29 | -     | -         |
| Crispld2 | 0.48040864  | 6.51E-10 | 2.75E-08 | -     | -         |
| Slc9a2   | 0.47906755  | 5.73E-05 | 9.05E-04 | yes   | -         |
| Samd5    | 0.47750409  | 7.33E-18 | 8.04E-16 | -     | -         |
| Mpzl2    | 0.47381934  | 2.96E-38 | 1.35E-35 | -     | -         |
| Sla      | 0.47324527  | 2.52E-04 | 3.31E-03 | yes   | -         |
| Col8a2   | 0.46488249  | 1.96E-29 | 4.79E-27 | yes   | -         |
| Cyth4    | 0.46204267  | 1.75E-16 | 1.55E-14 | -     | -         |
| Myl7     | 0.45999019  | 1.07E-06 | 2.59E-05 | yes   | -         |
| Panx3    | 0.45374763  | 6.69E-06 | 1.35E-04 | yes   | -         |
| Serpinb7 | 0.45372624  | 2.25E-07 | 6.16E-06 | -     | -         |
| Clcn1    | 0.45213171  | 1.45E-06 | 3.42E-05 | yes   | -         |

|          |            |          |          |     |     |
|----------|------------|----------|----------|-----|-----|
| S100a7a  | 0.45020126 | 1.22E-10 | 5.75E-09 | -   | -   |
| Ptpn22   | 0.44871832 | 2.23E-05 | 3.93E-04 | yes | -   |
| Tceal5   | 0.4441251  | 5.33E-06 | 1.10E-04 | -   | -   |
| Srpk3    | 0.44392535 | 2.83E-06 | 6.25E-05 | -   | -   |
| Shisa7   | 0.44060751 | 9.12E-05 | 1.37E-03 | -   | -   |
| Asic3    | 0.43553996 | 3.93E-10 | 1.71E-08 | -   | -   |
| Lamb3    | 0.43217604 | 3.46E-05 | 5.77E-04 | yes | -   |
| Ivl      | 0.42881492 | 5.58E-12 | 3.09E-10 | yes | -   |
| Cnn1     | 0.4272025  | 1.26E-21 | 1.91E-19 | yes | -   |
| Lman1l   | 0.42569056 | 2.19E-05 | 3.86E-04 | -   | -   |
| Ifi2712b | 0.42376666 | 5.59E-05 | 8.86E-04 | -   | -   |
| Actg2    | 0.42337119 | 8.34E-14 | 5.55E-12 | yes | -   |
| Npy4r    | 0.41355124 | 5.61E-08 | 1.74E-06 | -   | -   |
| Ctgf     | 0.41187401 | 3.84E-77 | 1.22E-73 | yes | -   |
| Serpinb2 | 0.40121654 | 1.24E-05 | 2.35E-04 | yes | -   |
| Pdgfb    | 0.39458773 | 4.25E-48 | 2.94E-45 | yes | yes |
| Pkp1     | 0.38019409 | 3.35E-10 | 1.47E-08 | yes | -   |
| Lmcd1    | 0.37827203 | 1.30E-10 | 6.05E-09 | yes | -   |
| Ctsw     | 0.37546569 | 1.72E-10 | 7.85E-09 | -   | -   |
| Grin2c   | 0.35999506 | 2.34E-12 | 1.36E-10 | yes | -   |
| Tnnt2    | 0.3131939  | 3.88E-12 | 2.20E-10 | yes | -   |
| Acsbg1   | 0.27220434 | 1.39E-21 | 2.07E-19 | -   | -   |
